# Supplementary material for: Visible Light Induced Green Transformation of Primary Amines to Imines Using a Silicate Supported Anatase Photocatalyst
Source: Molecules. 2015 Jan 26;20(2):1941–54. doi: 10.3390/molecules20021941 (PMC6272701; doi:10.3390/molecules20021941)
Supplement: Supplementary file 1 [file molecules-20-01941-s001.pdf]

## Supporting Information

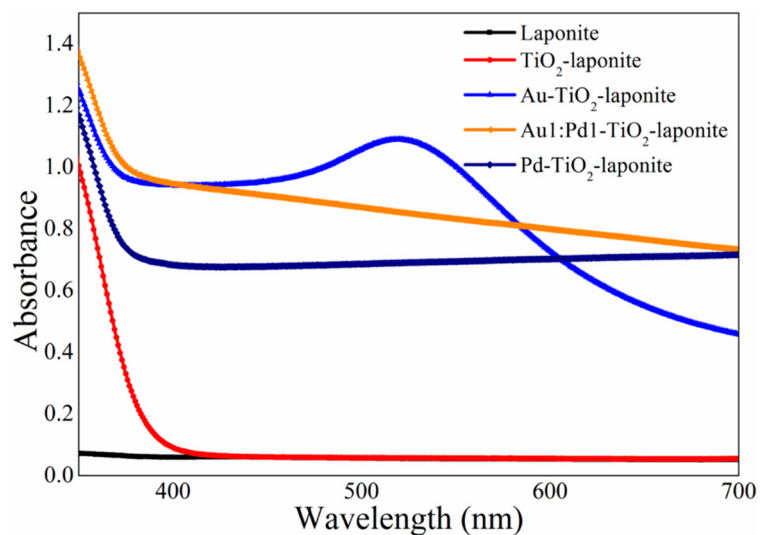

**Figure S1.** UV-Visible diffuse reflectance spectra of the metal loaded photocatalyst samples.

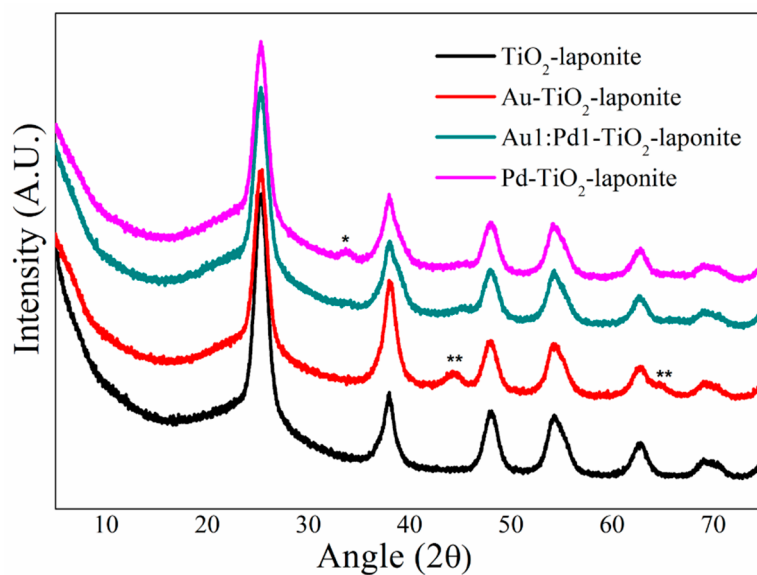

**Figure S2.** XRD peak patterns of the metal loaded photocatalyst samples. \*—peak related to Pd ( $2\theta = 34^\circ$ ), \*\*—peaks related to Au [002], [022].

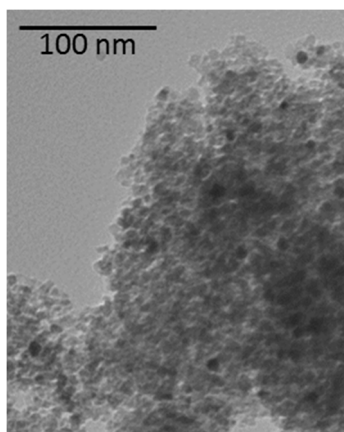

**Figure S3.** TEM image of 3% Au@ $\text{TiO}_2$ -S.
